# Supplementary material
Source: MDPI journal article supplement (https://www.mdpi.com/2073-4441/12/3/648)
Supplement: s1 [file s1]

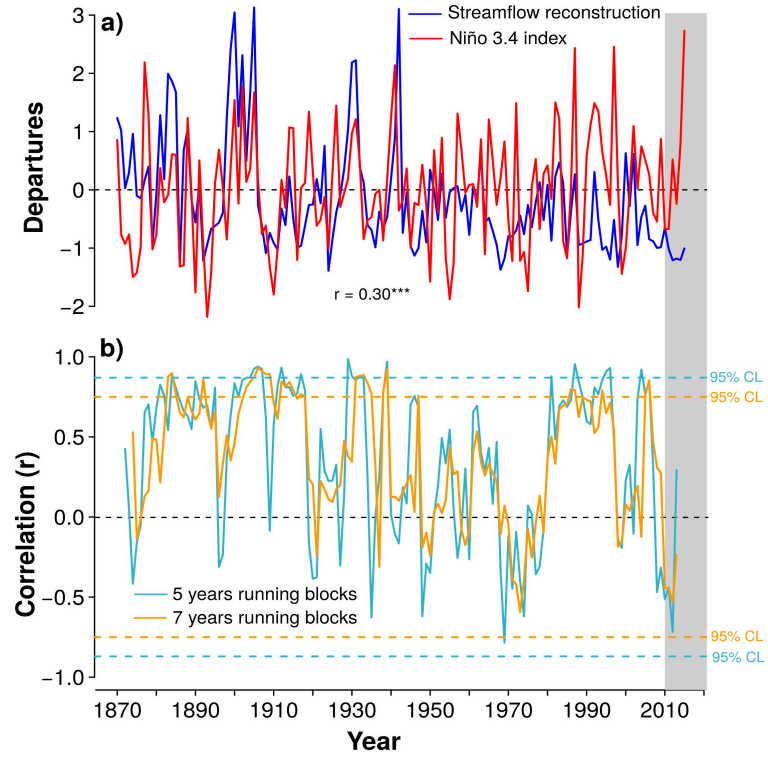

**Figure S1. (a)** The relationship between Petorca river reconstruction and El Niño 3.4 index from May to September months during 1870–2015 period. Pearson correlation value between both variables ( $r = 0.30$ ) present statistical significance at  $P < 0.001$ . **(b)** Moving Pearson correlation between the same variables at panel (a), but using blocks of 5 and 7 years. Significant correlations values at  $P < 0.05$  are indicated by respective color dashed lines. A vertical rectangle is added to represent the mega-drought interval.
